# Supplementary material for: A spatially resolved ratiometric electrochemiluminescence immunosensor for myoglobin detection using Au@Ag2S as signal amplification tags
Source: Royal Society of Chemistry journal article supplement (doi:10.1039/d2nj02918a), 2022-01-01
Supplement: d2nj02918a1.pdf [file d2nj02918a1.pdf]

1 Electronic Supplementary Material (ESI) for New Journal of Chemistry.  
2 This journal is © The Royal Society of Chemistry and the Centre National de la  
3 Recherche Scientifique 2022

4

5 **A spatial-resolved ratiometric electrochemiluminescence**  
6 **immunosensor for myoglobin detection using Au@Ag<sub>2</sub>S as signal**  
7 **amplification tags**

8 Chen Chen,<sup>a</sup> Jin-Xin Ma,<sup>a</sup> Hui Wang,<sup>a</sup> Hui-Qiao Liu,<sup>a</sup> Shu-Wei Ren,<sup>b</sup> Jun-Tao Cao,<sup>a,\*</sup>  
9 and Yan-Ming Liu<sup>a,\*</sup>

10 <sup>a</sup>College of Chemistry and Chemical Engineering, Xinyang Key Laboratory of Functional  
11 Nanomaterials for Bioanalysis, Xinyang Normal University, Xinyang 464000, P. R. China

12 <sup>b</sup>Xinyang Central Hospital, Xinyang 464000, P. R. China

13 \*Corresponding author: E-mail: jtcao11@163.com (J.-T. Cao) and liuym9518@sina.com (Y.-M.  
14 Liu), Tel & fax: +86-376-6392825.

15

16

17

18 **Analytical performance**

19

20 **Table S1.** Comparison the analytical performance of different methods for myoglobin  
21 detection

| Methods                        | Linear ranges<br>(g/mL)                      | Detection limit<br>(g/mL) | References |
|--------------------------------|----------------------------------------------|---------------------------|------------|
| cyclic voltammetry             | $5.0 \times 10^{-12}$ - $2.0 \times 10^{-8}$ | $1.2 \times 10^{-12}$     | 1          |
| surface plasmon resonance      | $1.0 \times 10^{-11}$ - $1.0 \times 10^{-6}$ | $1.0 \times 10^{-11}$     | 2          |
| differential pulse voltammetry | $1.0 \times 10^{-12}$ - $1.0 \times 10^{-6}$ | $2.1 \times 10^{-12}$     | 3          |
| photoelectrochemical           | $4.0 \times 10^{-13}$ - $1.0 \times 10^{-7}$ | $1.0 \times 10^{-13}$     | 4          |
| electrochemical                | $1.0 \times 10^{-11}$ - $1.0 \times 10^{-4}$ | $2.1 \times 10^{-12}$     | 5          |
| fluorescence                   | $3.0 \times 10^{-13}$ - $1.0 \times 10^{-7}$ | $4.5 \times 10^{-14}$     | 6          |
| electrochemiluminescence       | $1.0 \times 10^{-13}$ - $1.0 \times 10^{-7}$ | $5.0 \times 10^{-14}$     | This work  |

1

## 2 **References**

- 3 [1] B. Zhang, Y. Zhang, W. B. Liang, X. J. Yu, H. Tan, G. Q. Wang, A. M. Li, J. Jin,  
4 L. Huang, *RSC Adv.* 2017, **7**, 2486–2493.
- 5 [2] N. Singh, M. A. Ali, P. Rai, I. Ghori, A. Sharma, B. D. Malhotra, R. John, *Lab*  
6 *Chip* 2020, **20**, 760–777.
- 7 [3] A. Sharma, J. Bhardwaj, J. Jang, *ACS Omega* 2020, **5**, 3924–3931
- 8 [4] J. T. Cao, B. Wang, Y. X. Dong, Q. Wang, S. W. Ren, Y. M. Liu, W. W. Zhao,  
9 *ACS Sens.* 2018, **3**, 1087-1092.
- 10 [5] J. A. Ribeiro, C. M. Pereira, A. F. Silva, M. G. F. Sales, *Anal. Chim. Acta* 2017,  
11 **981**, 41-52.
- 12 [6] A. M. Piloto, D. S. M. Ribeiro, S. S. M. Rodrigues, C. Santos, J. L. M. Santos, M.  
13 G. F. Sales, *Sci. Rep.* 2018, **8**, 4944.

14
